# Supplementary material for: Cross-Species Meta-Analysis of Transcriptomic Data in Combination With Supervised Machine Learning Models Identifies the Common Gene Signature of Lactation Process
Source: Front Genet. 2018 Jul 12;9:235. doi: 10.3389/fgene.2018.00235 (PMC6052129; doi:10.3389/fgene.2018.00235)
Supplement: DATA SHEET S4 — The networks for DEGs were constructed using the neighbor joining algorithm. [file Data_Sheet_4.CSV]

RelationSymbolicName	ObjectType	Effect	Mechanism	RelationNumberOfReferences	RelationConfidenceLevel
positive Expression: HGF --+> CTNNB1	Expression	positive		22	3
positive Expression: thiazolidinediones --+> LPL	Expression	positive		22	3
positive Expression: glucose --+> CTNNB1	Expression	positive		35	3
Expression: EGFR ---> CTNNB1	Expression			27	3
Expression: CD44 ---> IL10	Expression			21	3
negative Expression: CTNNB1 ---| CEBPA	Expression	negative		34	3
negative Expression: CTNNB1 ---| PPARG	Expression	negative		65	3
positive Expression: MAPK1 --+> CTNNB1	Expression	positive		34	3
negative Expression: SOX17 ---| CTNNB1	Expression	negative		20	3
positive Expression: SB216763 --+> CTNNB1	Expression	positive		32	3
positive Expression: fibrates --+> LPL	Expression	positive		45	3
positive Expression: ADIPOQ --+> LPL	Expression	positive		27	3
Expression: hyaluronic acid ---> CD44	Expression			64	3
negative Expression: SIAH1 ---| CTNNB1	Expression	negative		50	3
positive Expression: IL1B --+> CD44	Expression	positive		21	3
positive Expression: SPP1 --+> CD44	Expression	positive		39	3
negative Expression: DKK1 ---| CTNNB1	Expression	negative		83	3
negative Expression: XAV939 ---| CTNNB1	Expression	negative		41	3
positive Expression: EGF --+> CTNNB1	Expression	positive		28	3
positive Expression: IGF1 --+> CTNNB1	Expression	positive		25	3
negative Expression: BTRC ---| CTNNB1	Expression	negative		72	3
positive Expression: dexamethasone --+> LPL	Expression	positive		21	3
Expression: TGFB1 ---> CD44	Expression			29	3
positive Expression: WNT3A --+> CTNNB1	Expression	positive		141	3
positive Expression: INS --+> LPL	Expression	positive		126	3
positive Expression: fatty acid --+> LPL	Expression	positive		29	3
positive Expression: TGFB1 --+> CTNNB1	Expression	positive		83	3
negative Expression: curcumin ---| CTNNB1	Expression	negative		46	3
negative Expression: IFNG ---| LPL	Expression	negative		33	3
positive Expression: lithium chloride --+> CTNNB1	Expression	positive		114	3
negative Expression: TP53 ---| CTNNB1	Expression	negative		54	3
Expression: APP ---> CTNNB1	Expression			22	3
Expression: retinoic acid ---> CTNNB1	Expression			22	3
positive Expression: TNF --+> FTH1	Expression	positive		30	3
Expression: PKM ---> CTNNB1	Expression			22	3
positive Expression: WNT1 --+> CTNNB1	Expression	positive		50	3
positive Expression: TNF --+> CD44	Expression	positive		55	3
Expression: dexamethasone ---> CTNNB1	Expression			25	3
positive Expression: MG132 --+> CTNNB1	Expression	positive		23	3
negative Expression: PSEN1 ---| CTNNB1	Expression	negative		31	3
positive Expression: PPIA --+> MMP9	Expression	positive		21	3
positive Expression: CTNNB1 --+> FGF8	Expression	positive		29	3
negative Expression: TNF ---| LPL	Expression	negative		89	3
negative Expression: CSNK1A1 ---| CTNNB1	Expression	negative		27	3
negative Expression: GSK3B ---| CTNNB1	Expression	negative		737	3
negative Expression: NOTCH1 ---| CTNNB1	Expression	negative		22	3
negative Expression: AXIN1 ---| CTNNB1	Expression	negative		248	3
negative Expression: WNT5A ---| CTNNB1	Expression	negative		66	3
negative Expression: AXIN2 ---| CTNNB1	Expression	negative		65	3
negative Expression: estrogen ---| LPL	Expression	negative		26	3
Expression: CD44 ---> MMP9	Expression			22	3
positive Expression: valproic acid --+> CTNNB1	Expression	positive		31	3
negative Expression: CTNNB1 ---| CDKN1A	Expression	negative		26	3
positive Expression: LEP --+> LPL	Expression	positive		28	3
positive Expression: Li+ --+> CTNNB1	Expression	positive		56	3
positive Expression: Fe2+ --+> FTH1	Expression	positive		41	3
Expression: TNF ---> CTNNB1	Expression			31	3
negative Expression: SOX9 ---| CTNNB1	Expression	negative		25	3
Expression: AKT1 ---> CTNNB1	Expression			80	3
negative Expression: CTNNB1 ---| SOX9	Expression	negative		53	3
negative Expression: epigallocatechin-3-gallate ---| CTNNB1	Expression	negative		21	3
positive Expression: BMP2 --+> CTNNB1	Expression	positive		20	3
positive Expression: CTNNB1 --+> BMP2	Expression	positive		24	3
positive Expression: rosiglitazone --+> LPL	Expression	positive		27	3
Expression: PIN1 ---> CTNNB1	Expression			20	3
negative Expression: APC ---| CTNNB1	Expression	negative		371	3
Expression: CDH1 ---> CTNNB1	Expression			66	3
Regulation: CTNNB1 ---> cell invasion	Regulation			74	3
positive Regulation: LRP6 --+> CTNNB1	Regulation	positive		119	3
positive Regulation: CD44 --+> wound healing	Regulation	positive		30	3
positive Regulation: CTNNB1 --+> cell growth	Regulation	positive		189	3
Regulation: CD44 ---> cell phenotype	Regulation			38	3
negative Regulation: PRDX1 ---| apoptosis	Regulation	negative		49	3
positive Regulation: CTNNB1 --+> cell phenotype	Regulation	positive		40	3
Regulation: CTNNB1 ---> cell behavior	Regulation			74	3
Regulation: STMN1 ---> cell cycle progression	Regulation			25	3
Regulation: CD44 ---> non-selective vesicle endocytosis	Regulation			100	3
Regulation: CD44 ---> phagocytosis	Regulation			31	3
positive Regulation: CTNNB1 --+> epithelial to mesenchymal transition	Regulation	positive		324	3
negative Regulation: CTNNB1 ---| chondrocyte differentiation	Regulation	negative		31	3
Regulation: CTNNB1 ---> cell transdifferentiation	Regulation			44	3
negative Regulation: CTNNB1 ---| cell cycle arrest	Regulation	negative		44	3
positive Regulation: CD44 --+> RAC1	Regulation	positive		27	3
Regulation: PPIA ---> oxidative stress	Regulation			32	3
positive Regulation: CD44 --+> HGF	Regulation	positive		21	3
positive Regulation: CTNNB1 --+> dedifferentiation	Regulation	positive		40	3
Regulation: CTNNB1 ---> T-cell development	Regulation			20	3
Regulation: STMN1 ---> cell migration	Regulation			31	3
positive Regulation: CTNNB1 --+> cell invasion	Regulation	positive		67	3
Regulation: LPL ---> lipogenesis	Regulation			30	3
positive Regulation: LPL --+> lipid transport	Regulation	positive		125	3
negative Regulation: CTNNB1 ---| adipogenesis	Regulation	negative		103	3
positive Regulation: ALPL --+> bone calcification	Regulation	positive		42	3
Regulation: LPL ---> lipoprotein metabolism	Regulation			107	3
Regulation: CTNNB1 ---> tissue maintenance	Regulation			30	3
positive Regulation: CD44 --+> cell invasion	Regulation	positive		106	3
positive Regulation: CD44 --+> RHOA	Regulation	positive		23	3
positive Regulation: CD44 --+> cell survival	Regulation	positive		68	3
Regulation: CD44 ---> cell death	Regulation			33	3
positive Regulation: CTNNB1 --+> Angiogenesis	Regulation	positive		86	3
positive Regulation: CD44 --+> SPP1	Regulation	positive		29	3
positive Regulation: TNKS --+> CTNNB1	Regulation	positive		25	3
positive Regulation: CTNNB1 --+> SMC proliferation	Regulation	positive		20	3
Regulation: carbohydrate ---> LPL	Regulation			22	3
negative Regulation: CTNNB1 ---| osteoclast differentiation	Regulation	negative		25	3
positive Regulation: LPL --+> internalization	Regulation	positive		30	3
positive Regulation: CTNNB1 --+> ossification	Regulation	positive		138	3
negative Regulation: FTH1 ---| apoptosis	Regulation	negative		42	3
Regulation: LPL ---> lipid metabolism	Regulation			167	3
negative Regulation: APOC1 ---| LPL	Regulation	negative		50	3
positive Regulation: CTNNB1 --+> regeneration	Regulation	positive		98	3
positive Regulation: RSPO1 --+> CTNNB1	Regulation	positive		59	3
Regulation: CTNNB1 ---> apoptosis	Regulation			487	3
Regulation: CTNNB1 ---> synaptogenesis	Regulation			20	3
negative Regulation: PRDX1 ---| oxidative stress	Regulation	negative		41	3
positive Regulation: PPIA --+> protein folding	Regulation	positive		31	3
positive Regulation: STMN1 --+> cell cycle	Regulation	positive		47	3
positive Regulation: CD44 --+> TGFB1	Regulation	positive		28	3
negative Regulation: APOA2 ---| LPL	Regulation	negative		21	3
Regulation: CTNNB1 ---> liver development	Regulation			41	3
positive Regulation: HSPA8 --+> non-selective vesicle endocytosis	Regulation	positive		28	3
Regulation: CTNNB1 ---> cell death	Regulation			76	3
positive Regulation: CD44 --+> cell migration	Regulation	positive		323	3
Regulation: ethanol ---> LPL	Regulation			20	3
negative Regulation: CTNNB1 ---| adipocyte differentiation	Regulation	negative		26	3
negative Regulation: STMN1 ---| apoptosis	Regulation	negative		42	3
Regulation: CTNNB1 ---> morphogenesis	Regulation			82	3
Regulation: CTNNB1 ---> chondrogenesis	Regulation			50	3
Regulation: CD44 ---> hemopoiesis	Regulation			23	3
positive Regulation: CTNNB1 --+> cell division	Regulation	positive		40	3
positive Regulation: PPIA --+> ROS generation	Regulation	positive		24	3
positive Regulation: CTNNB1 --+> cell migration	Regulation	positive		152	3
negative Regulation: FTH1 ---| oxidative stress	Regulation	negative		20	3
Regulation: STMN1 ---> mitosis	Regulation			51	3
Regulation: CD44 ---> leukocyte cell adhesion	Regulation			29	3
positive Regulation: CD44 --+> chemotaxis	Regulation	positive		36	3
positive Regulation: FRAT1 --+> CTNNB1	Regulation	positive		27	3
Regulation: CTNNB1 ---> osteoclast development	Regulation			24	3
positive Regulation: PPIA --+> cell proliferation	Regulation	positive		60	3
Regulation: LPL ---> cell differentiation	Regulation			34	3
positive Regulation: CTNNB1 --+> colony formation	Regulation	positive		56	3
Regulation: CD44 ---> cell rolling	Regulation			21	3
positive Regulation: LPL --+> liver uptake	Regulation	positive		33	3
Regulation: STMN1 ---> cell differentiation	Regulation			32	3
positive Regulation: CD44 --+> cell-cell adhesion	Regulation	positive		24	3
Regulation: CTNNB1 ---> developmental process	Regulation			47	3
positive Regulation: CD44 --+> cell aggregation	Regulation	positive		21	3
positive Regulation: CTNNB1 --+> hepatocyte proliferation	Regulation	positive		32	3
positive Regulation: CTNNB1 --+> hair follicle morphogenesis	Regulation	positive		32	3
positive Regulation: CTNNB1 --+> cell formation	Regulation	positive		56	3
Regulation: CD44 ---> internalization	Regulation			67	3
Regulation: CTNNB1 ---> transcription activation	Regulation			430	3
Regulation: CD44 ---> leukocyte extravasation	Regulation			20	3
Regulation: CTNNB1 ---> muscle cell differentiation	Regulation			25	3
Regulation: SF1 ---> mRNA splicing	Regulation			21	3
positive Regulation: CTNNB1 --+> anagen	Regulation	positive		40	3
Regulation: RAC1 ---> STMN1	Regulation			20	3
positive Regulation: CTNNB1 --+> myogenesis	Regulation	positive		42	3
Regulation: CTNNB1 ---> cell adhesion	Regulation			473	3
positive Regulation: CTNNB1 --+> cell motility	Regulation	positive		39	3
Regulation: CTNNB1 ---> cell-cell adhesion	Regulation			392	3
positive Regulation: PPIA --+> MAPK1	Regulation	positive		45	3
Regulation: CTNNB1 ---> cell viability	Regulation			24	3
Regulation: CTNNB1 ---> cell differentiation	Regulation			979	3
positive Regulation: CTNNB1 --+> cell survival	Regulation	positive		146	3
positive Regulation: CD44 --+> cell formation	Regulation	positive		28	3
positive Regulation: ALPL --+> biomineral formation	Regulation	positive		97	3
positive Regulation: PPIA --+> MAPK3	Regulation	positive		37	3
Regulation: PPIA ---> apoptosis	Regulation			54	3
positive Regulation: CTNNB1 --+> cell interaction	Regulation	positive		34	3
positive Regulation: RSPO2 --+> CTNNB1	Regulation	positive		26	3
Regulation: PRDX1 ---> cell proliferation	Regulation			24	3
Regulation: CTNNB1 ---> cell polarity	Regulation			27	3
positive Regulation: CD44 --+> engraftment	Regulation	positive		31	3
negative Regulation: CTNNB1 ---| bone resorption	Regulation	negative		35	3
positive Regulation: CTNNB1 --+> neurogenesis	Regulation	positive		68	3
Regulation: CTNNB1 ---> protein ubiquitination	Regulation			187	3
Regulation: CD44 ---> cell interaction	Regulation			63	3
Regulation: HSPA8 ---> protein folding	Regulation			43	3
positive Regulation: CD44 --+> cell motility	Regulation	positive		107	3
Regulation: CTNNB1 ---> mitosis	Regulation			25	3
negative Regulation: WWTR1 ---| CTNNB1	Regulation	negative		20	3
Regulation: CD44 ---> Angiogenesis	Regulation			72	3
positive Regulation: HSPA8 --+> protein ubiquitination	Regulation	positive		29	3
Regulation: CTNNB1 ---> cell cycle	Regulation			96	3
positive Regulation: STMN1 --+> cell motility	Regulation	positive		28	3
positive Regulation: CTNNB1 --+> cell proliferation	Regulation	positive		971	3
positive Regulation: CTNNB1 --+> drug resistance	Regulation	positive		45	3
Regulation: CD44 ---> apoptosis	Regulation			209	3
Regulation: CD44 ---> cell-matrix adhesion	Regulation			20	3
Regulation: CTNNB1 ---> gastrulation	Regulation			38	3
Regulation: CTNNB1 ---> stem cell renewal	Regulation			22	3
positive Regulation: CTNNB1 --+> stem cell proliferation	Regulation	positive		35	3
positive Regulation: LPL --+> lipid storage	Regulation	positive		172	3
Regulation: LPL ---> energy homeostasis	Regulation			20	3
negative Regulation: CTNNB1 ---| inflammatory response	Regulation	negative		27	3
positive Regulation: CD44 --+> drug resistance	Regulation	positive		69	3
Regulation: LIPC ---> LPL	Regulation			24	3
Regulation: CTNNB1 ---> epithelial cell proliferation	Regulation			22	3
positive Regulation: PTGS2 --+> CTNNB1	Regulation	positive		32	3
Regulation: CD44 ---> inflammatory response	Regulation			44	3
positive Regulation: CTNNB1 --+> cell cycle progression	Regulation	positive		60	3
Regulation: CD44 ---> lymphocyte homing	Regulation			43	3
Regulation: LPL ---> Lipid degradation	Regulation			434	3
positive Regulation: APOA4 --+> LPL	Regulation	positive		36	3
Regulation: CTNNB1 ---> endochondral ossification	Regulation			23	3
positive Regulation: STMN1 --+> microtubule depolymerization	Regulation	positive		29	3
positive Regulation: PPIA --+> chemotaxis	Regulation	positive		41	3
Regulation: CD44 ---> cell growth	Regulation			40	3
Regulation: CTNNB1 ---> senescence	Regulation			20	3
Regulation: HSPA8 ---> autophagy	Regulation			82	3
positive Regulation: CD44 --+> MAPK1	Regulation	positive		57	3
Regulation: PRL ---> LPL	Regulation			28	3
Regulation: PPIA ---> viral reproduction	Regulation			110	3
negative Regulation: APOC3 ---| LPL	Regulation	negative		417	3
Regulation: CD44 ---> T-cell activation	Regulation			41	3
Regulation: CTNNB1 ---> cell fate determination	Regulation			20	3
Regulation: CTNNB1 ---> axis specification	Regulation			28	3
Regulation: STMN1 ---> microtubule cytoskeleton organization	Regulation			146	3
Regulation: CTNNB1 ---> cell migration	Regulation			146	3
positive Regulation: CD44 --+> epithelial to mesenchymal transition	Regulation	positive		60	3
positive Regulation: WNT7A --+> CTNNB1	Regulation	positive		26	3
positive Regulation: CTNNB1 --+> cell quantity	Regulation	positive		26	3
Regulation: CTNNB1 ---> nerve cell differentiation	Regulation			51	3
Regulation: CD44 ---> lymphocyte adhesion	Regulation			21	3
Regulation: TKT ---> Pentose-phosphate shunt	Regulation			57	3
Regulation: CTNNB1 ---> cell fate	Regulation			128	3
Regulation: CD44 ---> immune response	Regulation			37	3
Regulation: CTNNB1 ---> stem cell maintenance	Regulation			32	3
negative Regulation: WNT11 ---| CTNNB1	Regulation	negative		25	3
Regulation: CD44 ---> cell differentiation	Regulation			174	3
positive Regulation: CD44 --+> AKT1	Regulation	positive		39	3
positive Regulation: STMN1 --+> cell proliferation	Regulation	positive		89	3
positive Regulation: CD44 --+> cell proliferation	Regulation	positive		289	3
Regulation: PTN ---> CTNNB1	Regulation			33	3
Regulation: CTNNB1 ---> stem cell differentiation	Regulation			48	3
negative Regulation: STMN1 ---| microtubule cytoskeleton assembly	Regulation	negative		136	3
Regulation: CD44 ---> cell behavior	Regulation			97	3
positive Regulation: CTNNB1 --+> osteoblast differentiation	Regulation	positive		125	3
Regulation: CTNNB1 ---> skeletal development	Regulation			20	3
positive Regulation: LPL --+> foam cell formation	Regulation	positive		50	3
positive Regulation: CD44 --+> fibroblast migration	Regulation	positive		20	3
Regulation: CTNNB1 ---> wound healing	Regulation			47	3
negative Regulation: testosterone ---| LPL	Regulation	negative		58	3
negative Regulation: ANGPTL3 ---| LPL	Regulation	negative		126	3
Regulation: PRDX1 ---> cell death	Regulation			28	3
positive Regulation: CTNNB1 --+> cell differentiation	Regulation	positive		51	3
Regulation: CTNNB1 ---> embryonal development	Regulation			137	3
positive Regulation: CD44 --+> transendothelial migration	Regulation	positive		22	3
positive Regulation: CD44 --+> MAPK3	Regulation	positive		34	3
negative Regulation: HSPA8 ---| apoptosis	Regulation	negative		48	3
Regulation: CD44 ---> cell adhesion	Regulation			263	3
