# Supplementary material for: Cross-Species Meta-Analysis of Transcriptomic Data in Combination With Supervised Machine Learning Models Identifies the Common Gene Signature of Lactation Process
Source: Front Genet. 2018 Jul 12;9:235. doi: 10.3389/fgene.2018.00235 (PMC6052129; doi:10.3389/fgene.2018.00235)
Supplement: DATA SHEET S7 — Statistically significant subnetworks with downstream neighbors by down-regulated. [file Data_Sheet_7.XLSX]

## Sheet: ALL
Name	Total # of Neighbors	Gene Set Seed	Overlap	Percent Overlap	Overlapping Entities	p-value	Jaccard similarity	Hit type
Downstream Neighbors of SPARC	184	SPARC	4	2	LPL;CD44;HES5;CTNNB1	2.37115e-07	0.0212766	Downstream Neighbors
Downstream Neighbors of RHAG	5	RHAG	2	33	CD44;CTNNB1	1.55562e-06	0.181818	Downstream Neighbors
Downstream Neighbors of CCAT2	5	CCAT2	2	33	CD44;CTNNB1	1.55562e-06	0.181818	Downstream Neighbors
Downstream Neighbors of PAK1	297	PAK1	4	1	TNNC1;LPL;CD44;CTNNB1	1.59451e-06	0.013289	Downstream Neighbors
Downstream Neighbors of NOTCH4	79	NOTCH4	3	3	CD44;HES5;CTNNB1	2.09506e-06	0.0357143	Downstream Neighbors
Downstream Neighbors of ATP	1714	ATP	6	0	THTPA;TNNC1;FIS1;CD44;LPL;CTNNB1	2.47088e-06	0.0034965	Downstream Neighbors
Downstream Neighbors of ENPP2	89	ENPP2	3	3	LPL;CD44;CTNNB1	2.99124e-06	0.0319149	Downstream Neighbors
Downstream Neighbors of RORC	91	RORC	3	3	LPL;CD44;CTNNB1	3.19652e-06	0.03125	Downstream Neighbors
Downstream Neighbors of FGF19	117	FGF19	3	2	CD44;HES5;CTNNB1	6.76772e-06	0.0245902	Downstream Neighbors
Downstream Neighbors of POMGNT1	11	POMGNT1	2	16	LPL;CTNNB1	6.83794e-06	0.117647	Downstream Neighbors
Downstream Neighbors of HOTAIR	119	HOTAIR	3	2	LPL;CD44;CTNNB1	7.11863e-06	0.0241935	Downstream Neighbors
Downstream Neighbors of MIR590	126	MIR590	3	2	LPL;CD44;CTNNB1	8.44142e-06	0.0229008	Downstream Neighbors
Downstream Neighbors of PTPRD	13	PTPRD	2	14	CD44;CTNNB1	9.42495e-06	0.105263	Downstream Neighbors
Downstream Neighbors of NRG1	476	NRG1	4	0	TNNC1;CD44;HES5;CTNNB1	1.03212e-05	0.00833333	Downstream Neighbors
Downstream Neighbors of 4-Methylthio-2-oxobutanoic acid	15	4-Methylthio-2-oxobutanoic acid	2	12	CD44;CTNNB1	1.24244e-05	0.0952381	Downstream Neighbors
Downstream Neighbors of KIAA0101	15	KIAA0101	2	12	CD44;CTNNB1	1.24244e-05	0.0952381	Downstream Neighbors
Downstream Neighbors of ALDOC	16	ALDOC	2	11	LPL;CTNNB1	1.40786e-05	0.0909091	Downstream Neighbors
Downstream Neighbors of sulfate	150	sulfate	3	1	LPL;CD44;CTNNB1	1.41914e-05	0.0193548	Downstream Neighbors
Downstream Neighbors of glucose	2340	glucose	6	0	THTPA;FIS1;CD44;LPL;HES5;CTNNB1	1.55601e-05	0.00256191	Downstream Neighbors
Downstream Neighbors of sphingolipid	155	sphingolipid	3	1	LPL;CD44;CTNNB1	1.56467e-05	0.01875	Downstream Neighbors
Downstream Neighbors of DKK4	17	DKK4	2	11	CD44;CTNNB1	1.58358e-05	0.0869565	Downstream Neighbors
Downstream Neighbors of PIWIL1	17	PIWIL1	2	11	CD44;CTNNB1	1.58358e-05	0.0869565	Downstream Neighbors
Downstream Neighbors of SLFN12	17	SLFN12	2	11	CD44;CTNNB1	1.58358e-05	0.0869565	Downstream Neighbors
Downstream Neighbors of MUC2	18	MUC2	2	10	CD44;CTNNB1	1.76959e-05	0.0833333	Downstream Neighbors
Downstream Neighbors of MFAP5	19	MFAP5	2	10	TNNC1;CTNNB1	1.96589e-05	0.08	Downstream Neighbors
Downstream Neighbors of FZD6	19	FZD6	2	10	CD44;CTNNB1	1.96589e-05	0.08	Downstream Neighbors
Downstream Neighbors of PLAG1	19	PLAG1	2	10	CD44;CTNNB1	1.96589e-05	0.08	Downstream Neighbors
Downstream Neighbors of USP6	20	USP6	2	9	CD44;CTNNB1	2.17247e-05	0.0769231	Downstream Neighbors
Downstream Neighbors of ESRRA	180	ESRRA	3	1	TNNC1;LPL;CTNNB1	2.4413e-05	0.0162162	Downstream Neighbors
Downstream Neighbors of vitamin D	594	vitamin D	4	0	TNNC1;LPL;CD44;CTNNB1	2.46932e-05	0.00668896	Downstream Neighbors
Downstream Neighbors of ADAM10	184	ADAM10	3	1	CD44;HES5;CTNNB1	2.60614e-05	0.015873	Downstream Neighbors
Downstream Neighbors of APC	186	APC	3	1	CD44;HES5;CTNNB1	2.69124e-05	0.0157068	Downstream Neighbors
Downstream Neighbors of RBM3	23	RBM3	2	8	CD44;CTNNB1	2.85382e-05	0.0689655	Downstream Neighbors
Downstream Neighbors of LHX6	23	LHX6	2	8	CD44;CTNNB1	2.85382e-05	0.0689655	Downstream Neighbors
Downstream Neighbors of WNT3A	631	WNT3A	4	0	LPL;CD44;HES5;CTNNB1	3.13094e-05	0.00629921	Downstream Neighbors
Downstream Neighbors of CLDN4	25	CLDN4	2	7	CD44;CTNNB1	3.35936e-05	0.0645161	Downstream Neighbors
Downstream Neighbors of AKAP1	25	AKAP1	2	7	FIS1;LPL	3.35936e-05	0.0645161	Downstream Neighbors
Downstream Neighbors of FAM123B	25	FAM123B	2	7	CD44;CTNNB1	3.35936e-05	0.0645161	Downstream Neighbors
Downstream Neighbors of GNL3L	25	GNL3L	2	7	CD44;CTNNB1	3.35936e-05	0.0645161	Downstream Neighbors
Downstream Neighbors of DSG3	26	DSG3	2	7	CD44;CTNNB1	3.62751e-05	0.0625	Downstream Neighbors
Downstream Neighbors of CASR	206	CASR	3	1	CD44;LPL;CTNNB1	3.64515e-05	0.014218	Downstream Neighbors
Downstream Neighbors of EDNRA	209	EDNRA	3	1	CD44;LPL;CTNNB1	3.80502e-05	0.0140187	Downstream Neighbors
Downstream Neighbors of NCSTN	27	NCSTN	2	7	CD44;HES5	3.9059e-05	0.0606061	Downstream Neighbors
Downstream Neighbors of SOD2	218	SOD2	3	1	CD44;LPL;CTNNB1	4.31223e-05	0.0134529	Downstream Neighbors
Downstream Neighbors of NEU1	219	NEU1	3	1	THTPA;CD44;CTNNB1	4.37119e-05	0.0133929	Downstream Neighbors
Downstream Neighbors of IL11	221	IL11	3	1	CD44;LPL;CTNNB1	4.4907e-05	0.0132743	Downstream Neighbors
Downstream Neighbors of CLEC1B	29	CLEC1B	2	6	CD44;CTNNB1	4.4934e-05	0.0571429	Downstream Neighbors
Downstream Neighbors of ANGPT1	229	ANGPT1	3	1	CD44;LPL;CTNNB1	4.99025e-05	0.0128205	Downstream Neighbors
Downstream Neighbors of BDNF	712	BDNF	4	0	CD44;LPL;HES5;CTNNB1	5.02726e-05	0.00558659	Downstream Neighbors
Downstream Neighbors of EBF2	31	EBF2	2	6	HES5;CTNNB1	5.12181e-05	0.0540541	Downstream Neighbors
Downstream Neighbors of TRPC5	32	TRPC5	2	6	LPL;CTNNB1	5.45134e-05	0.0526316	Downstream Neighbors
Downstream Neighbors of KIT	236	KIT	3	1	LPL;CD44;CTNNB1	5.45627e-05	0.0124481	Downstream Neighbors
Downstream Neighbors of P2RX7	237	P2RX7	3	1	CD44;LPL;CTNNB1	5.5251e-05	0.0123967	Downstream Neighbors
Downstream Neighbors of melatonin	737	melatonin	4	0	FIS1;LPL;CD44;CTNNB1	5.7543e-05	0.00539811	Downstream Neighbors
Downstream Neighbors of EDN1	743	EDN1	4	0	TNNC1;LPL;CD44;CTNNB1	5.93975e-05	0.00535475	Downstream Neighbors
Downstream Neighbors of arginine	745	arginine	4	0	THTPA;LPL;CD44;CTNNB1	6.00253e-05	0.00534045	Downstream Neighbors
Downstream Neighbors of HMMR	35	HMMR	2	5	CD44;CTNNB1	6.50121e-05	0.0487805	Downstream Neighbors
Downstream Neighbors of TNIK	35	TNIK	2	5	CD44;CTNNB1	6.50121e-05	0.0487805	Downstream Neighbors
Downstream Neighbors of PTGER4	251	PTGER4	3	1	CD44;LPL;CTNNB1	6.54943e-05	0.0117188	Downstream Neighbors
Downstream Neighbors of SGK1	257	SGK1	3	1	CD44;HES5;CTNNB1	7.0241e-05	0.0114504	Downstream Neighbors
Downstream Neighbors of MGAT3	37	MGAT3	2	5	CD44;CTNNB1	7.25212e-05	0.0465116	Downstream Neighbors
Downstream Neighbors of STK11	261	STK11	3	1	LPL;CD44;CTNNB1	7.35278e-05	0.0112782	Downstream Neighbors
Downstream Neighbors of ART1	38	ART1	2	5	CD44;CTNNB1	7.64286e-05	0.0454545	Downstream Neighbors
Downstream Neighbors of FZD8	38	FZD8	2	5	CD44;CTNNB1	7.64286e-05	0.0454545	Downstream Neighbors
Downstream Neighbors of IL33	268	IL33	3	1	CD44;LPL;CTNNB1	7.95203e-05	0.010989	Downstream Neighbors
Downstream Neighbors of TWIST1	268	TWIST1	3	1	FIS1;CD44;CTNNB1	7.95203e-05	0.010989	Downstream Neighbors
Downstream Neighbors of GNL3	39	GNL3	2	5	CD44;CTNNB1	8.04378e-05	0.0444444	Downstream Neighbors
Downstream Neighbors of glutamate	810	glutamate	4	0	THTPA;FIS1;LPL;CTNNB1	8.32296e-05	0.004914	Downstream Neighbors
Downstream Neighbors of cysteine	820	cysteine	4	0	THTPA;CD44;LPL;HES5	8.73116e-05	0.00485437	Downstream Neighbors
Downstream Neighbors of NMU	41	NMU	2	4	CD44;CTNNB1	8.87615e-05	0.0425532	Downstream Neighbors
Downstream Neighbors of ALCAM	41	ALCAM	2	4	CD44;CTNNB1	8.87615e-05	0.0425532	Downstream Neighbors
Downstream Neighbors of Mg2+	824	Mg2+	4	0	THTPA;TNNC1;LPL;CTNNB1	8.89851e-05	0.00483092	Downstream Neighbors
Downstream Neighbors of fatty acids	829	fatty acids	4	0	FIS1;LPL;CD44;CTNNB1	9.11099e-05	0.00480192	Downstream Neighbors
Downstream Neighbors of FAP	42	FAP	2	4	CD44;CTNNB1	9.30759e-05	0.0416667	Downstream Neighbors
Downstream Neighbors of ACTB	284	ACTB	3	1	TNNC1;CD44;CTNNB1	9.44027e-05	0.0103806	Downstream Neighbors
Downstream Neighbors of SFRP4	43	SFRP4	2	4	CD44;CTNNB1	9.74919e-05	0.0408163	Downstream Neighbors
Downstream Neighbors of FZD1	43	FZD1	2	4	CD44;CTNNB1	9.74919e-05	0.0408163	Downstream Neighbors
Downstream Neighbors of heparan sulfate	288	heparan sulfate	3	1	LPL;CD44;CTNNB1	9.83888e-05	0.0102389	Downstream Neighbors
Downstream Neighbors of MAML1	44	MAML1	2	4	HES5;CTNNB1	0.00010201	0.04	Downstream Neighbors
Downstream Neighbors of FGF1	294	FGF1	3	1	CD44;LPL;CTNNB1	0.000104573	0.0100334	Downstream Neighbors
Downstream Neighbors of FOXQ1	45	FOXQ1	2	4	CD44;CTNNB1	0.000106629	0.0392157	Downstream Neighbors
Downstream Neighbors of LPA	46	LPA	2	4	LPL;CTNNB1	0.000111349	0.0384615	Downstream Neighbors
Downstream Neighbors of FEZF2	47	FEZF2	2	4	HES5;CTNNB1	0.000116171	0.0377358	Downstream Neighbors
Downstream Neighbors of SRF	311	SRF	3	0	TNNC1;FIS1;CTNNB1	0.000123466	0.00949367	Downstream Neighbors
Downstream Neighbors of MUC4	49	MUC4	2	4	CD44;CTNNB1	0.000126119	0.0363636	Downstream Neighbors
Downstream Neighbors of TRIM33	49	TRIM33	2	4	CD44;CTNNB1	0.000126119	0.0363636	Downstream Neighbors
Downstream Neighbors of IL15RA	49	IL15RA	2	4	CD44;CTNNB1	0.000126119	0.0363636	Downstream Neighbors
Downstream Neighbors of H2O2	1881	H2O2	5	0	TNNC1;FIS1;LPL;CD44;CTNNB1	0.00012737	0.00265393	Downstream Neighbors
Downstream Neighbors of GSK3B	906	GSK3B	4	0	TNNC1;CD44;HES5;CTNNB1	0.000128775	0.0043956	Downstream Neighbors
Downstream Neighbors of TNFRSF1A	317	TNFRSF1A	3	0	LPL;CD44;CTNNB1	0.000130633	0.00931677	Downstream Neighbors
Downstream Neighbors of AQP3	50	AQP3	2	3	CD44;CTNNB1	0.000131245	0.0357143	Downstream Neighbors
Downstream Neighbors of TNNT2	51	TNNT2	2	3	TNNC1;CTNNB1	0.000136472	0.0350877	Downstream Neighbors
Downstream Neighbors of ROR1	51	ROR1	2	3	HES5;CTNNB1	0.000136472	0.0350877	Downstream Neighbors
Downstream Neighbors of MIR410	51	MIR410	2	3	LPL;CTNNB1	0.000136472	0.0350877	Downstream Neighbors
Downstream Neighbors of tryptophan	329	tryptophan	3	0	THTPA;LPL;CTNNB1	0.000145773	0.00898204	Downstream Neighbors
Downstream Neighbors of DDX3X	53	DDX3X	2	3	CD44;CTNNB1	0.00014723	0.0338983	Downstream Neighbors
Downstream Neighbors of ADRB2	334	ADRB2	3	0	CD44;LPL;CTNNB1	0.000152406	0.00884956	Downstream Neighbors
Downstream Neighbors of TCF3	336	TCF3	3	0	CD44;HES5;CTNNB1	0.000155113	0.00879765	Downstream Neighbors
Downstream Neighbors of MTOR	960	MTOR	4	0	LPL;CD44;HES5;CTNNB1	0.000161272	0.00414938	Downstream Neighbors
Downstream Neighbors of VLDLR	56	VLDLR	2	3	LPL;CTNNB1	0.000164125	0.0322581	Downstream Neighbors
