# Supplementary material for: Cross-Species Meta-Analysis of Transcriptomic Data in Combination With Supervised Machine Learning Models Identifies the Common Gene Signature of Lactation Process
Source: Front Genet. 2018 Jul 12;9:235. doi: 10.3389/fgene.2018.00235 (PMC6052129; doi:10.3389/fgene.2018.00235)
Supplement: DATA SHEET S11 — The number of attribute weighting algorithm for all common genes. [file Data_Sheet_11.XLS]

## Sheet: RapidMiner Data
Uncertainty	Gini Index	Chi Squared	Rule	Info Gain Ratio	Info Gain	Attribute	Count 50%
1	1	1	0.595238	0	1	RSU1	5
0.648318	0	0.248041	1	0.694636	0	MTCH1	3
0.584289	0.0412245	0.243666	0.714286	1	0.0474235	DDR1	3
0.612728	0.0160341	0.247981	1	0.694636	0.0520906	PSEN2	3
0.587965	0.136652	0.136986	0.714286	0.855336	0.211397	GCLC	3
0.551551	0.0510508	0.226569	0.714286	0.778245	0.040386	MRPS18B	3
0.61537	0.0756937	0.232437	0.714286	0.928709	0.0520906	SEC61A1	3
0.655738	0.00292851	0.257574	0.714286	0.855336	0.10596	MESDC2	3
0.547298	0.0498286	0.196429	0.714286	0.778245	0.0653196	PPIA	3
0.820835	0.138189	0.255639	0.714286	0.552102	0.238152	FOS	3
0.628719	0.0412245	0.260481	0.714286	0.778245	0.0852342	PSMB4	3
0.533787	0.00436684	0.229185	0.714286	0.778245	0.00246504	PDIA5	3
0.631877	0.0605125	0.247094	0.714286	0.778245	0.0954914	GLT8D1	3
0.594254	0.0749924	0.23132	0.714286	0.778245	0.119999	TAGLN2	3
0.602051	0.0995515	0.247173	0.714286	0.778245	0.173755	HDAC3	3
0.566716	0.0160341	0.232554	0.714286	0.778245	0.0128172	TPP1	3
0.575735	0.0252993	0.237465	0.714286	0.778245	0.0316134	NEDD8	3
0.583664	0.0160341	0.236276	0.714286	0.778245	0.0316134	FGD1	3
0.531217	0.00436684	0.230719	0.714286	0.855336	0.00888717	RAP1GDS1	3
0.593683	0.0403816	0.232102	0.714286	0.855336	0.0417306	ATP5B	3
0.645749	0.0510508	0.234802	0.714286	0.778245	0.0954914	SDAD1	3
0.795418	0.123458	0.255639	0.714286	0.525608	0.224596	VAMP8	3
0.670859	0.0252993	0.263398	0.714286	0.778245	0.0368342	THTPA	3
0.846607	0.136652	0.296496	0.714286	0.525608	0.224596	PLXNA2	3
0.758095	0.123458	0.246305	0.714286	0.598783	0.224596	FTH1	3
0.51026	0.0160341	0.159858	0.714286	0.598783	0.0217293	VPS25	3
0.740662	0.0510508	0.136986	0.714286	0.598783	0.040386	POMGNT1	3
0.583806	0.0160341	0.212235	0.714286	0.598783	0.0128172	ABT1	3
0.624371	0.0510508	0.221213	0.714286	0.694636	0.0556467	YARS	3
0.560461	0.128978	0.188574	0.714286	0.668926	0.0852342	RPLP2	3
0.545041	0.105899	0.156971	0.714286	0.598783	0.134054	RPS28	3
0.594021	0.0633418	0.224624	0.714286	0.694636	0.119999	PPP2R1A	3
0.501579	0.0343112	0.223936	0.714286	0.694636	0.0446977	CAPZA2	3
0.538734	0.0909021	0.136986	0.714286	0.598783	0.173755	LAS1L	3
0.558779	0.0330234	0.264993	0.714286	0.598783	0.0262616	RNF126	3
0.563897	0.0822709	0.229371	0.714286	0.668926	0.0586975	EMP3	3
0.580786	0	0.232161	0.714286	0.598783	0.00536995	AUP1	3
0.639095	0.0160341	0.247683	0.714286	0.598783	0.0556467	DAZAP2	3
0.561461	0.0466289	0.244004	0.714286	0.598783	0.0822677	SP1	3
0.532023	0.0343112	0.228198	0.714286	0.598783	0.0446977	ID2	3
0.547515	0.0403816	0.236034	0.714286	0.598783	0.0401783	AKR1B1	3
0.523471	0.00436684	0.232089	0.714286	0.598783	0.00985416	RTN4	3
0.572291	0.0330234	0.230576	0.714286	0.598783	0.032296	GPX1	3
0.718076	0.227454	0.220141	0.72619	0.671339	0.296377	GPAA1	3
0.538359	0.0510508	0.173935	0.714286	0.598783	0.127566	STMN1	3
0.737205	0.109282	0.290541	0.714286	0.500263	0.211397	PLD3	3
0.672639	0.0575522	0.273799	0.714286	0.694636	0.161807	OGT	3
0.597623	0.0510508	0.236969	0.714286	0.694636	0.0423868	PSMC4	3
0.571136	0.0510508	0.241893	0.714286	0.598783	0.0954914	ELOVL5	3
0.667517	0.04799	0.270005	0.714286	0.694636	0.0401783	HGF	3
0.631639	0.0403816	0.250362	0.714286	0.598783	0.0401783	BAT1	3
0.549224	0.0330234	0.228907	0.714286	0.598783	0.0262616	PSPH	3
0.68432	0.203386	0.204082	0.75	0.694636	0.296377	KDELR2	3
0.533042	0.0160341	0.235555	0.714286	0.694636	0.0128172	NUMA1	3
0.570747	0	0.239648	0.714286	0.598783	0.0653196	DSTN	3
0.665617	0.0403816	0.281612	0.714286	0.598783	0.0401783	P4HA1	3
0.634778	0.0330234	0.225366	0.714286	0.578015	0.0461538	HSPA8	3
0.594601	0.0195339	0.25115	0.714286	0.598783	0.032296	ADRBK1	3
0.214982	0.124406	0.0228571	0.714286	1	0.0592572	EIF4B	2
0.61691	0.0510508	0.260241	1	0.474439	0.040386	ADSL	2
0.674042	0.00987272	0.277935	1	0.35212	0.00141307	AHCY	2
0.696236	0.0330234	0.273222	1	0.474439	0.0262616	IGFBP6	2
0.568381	0.0242007	0.237479	1	0.474439	0.0270691	RBMS1	2
0.767917	0.0697918	0.265306	0.714286	0.474439	0.173755	RPL18A	2
0.833016	0.0633418	0.204082	0.714286	0.408932	0.161807	C3	2
0.442391	0.0744202	0.175825	0.714286	0.855336	0.0181915	ALPL	2
0.322573	0.00987272	0.0968238	0.714286	0.778245	0.00141307	PLA2G1B	2
0.765308	0.120765	0.272393	0.714286	0.434356	0.171829	EEF1D	2
0.78826	0.0749924	0.246305	0.714286	0.408932	0.161807	CD44	2
0.433291	0.0160341	0.126798	0.714286	0.778245	0.0368342	RPS25	2
0.831088	0.0824765	0.275325	0.714286	0.452717	0.185993	RPS12	2
0.819429	0.0330234	0.332295	0.714286	0.208087	0.0262616	PRDX5	2
0.55285	0.0242007	0.241781	0.714286	0.189124	0.0270691	ARHGAP29	2
0.0344587	0	0.00267023	0.714286	0.694636	0	PGRMC1	2
0.0344587	0.0242007	0.00267023	0.714286	0.694636	0.0270691	AP3B1	2
0.565515	0.0909021	0.120301	0.714286	0.380463	0.145164	NDUFV2	2
0.678821	0.0330234	0.125714	0.714286	0.279374	0.0852342	POLE3	2
0.62972	0.0824765	0.189059	0.714286	0.474439	0.185993	DDX56	2
0.689238	0.0510508	0.210884	0.714286	0.474439	0.040386	USP11	2
0.646391	0.0184073	0.17484	0.714286	0.279374	0.0852342	AK1	2
0.583149	0.0510508	0.142857	0.714286	0.474439	0.116648	UQCRC2	2
0.616753	0.0242007	0.155102	0.714286	0.190332	0.036468	CALR	2
0.645506	0.0749924	0.214145	0.714286	0.474439	0.10793	USP12	2
0.621931	0.0510508	0.210219	0.714286	0.474439	0.0520906	COL6A2	2
0.335954	0.0510508	0.0986132	0.714286	0.598783	0.040386	IGJ	2
0.56498	0.0333061	0.193651	0.714286	0.295963	0.0954914	CLDN3	2
0.430508	0.109282	0.0860585	0.714286	0.500263	0.211397	RPN2	2
0.594519	0.0510508	0.205723	0.714286	0.34934	0.127566	RPL27	2
0.58181	0	0.242177	0.714286	0.144265	0	PIM1	2
0.204633	0	0.0727259	0.714286	0.598783	0	LPL	2
0.653454	0.0833076	0.257574	0.714286	0.34934	0.127566	ELOF1	2
0.552927	0.0160341	0.208846	0.714286	0.474439	0.0128172	IER2	2
0.691095	0.076851	0.235338	0.714286	0.408932	0.161807	ADD3	2
0.563376	0.0901073	0.167687	0.714286	0.474439	0.12047	BRWD1	2
0.508334	0.0160341	0.165791	0.714286	0.232766	0.0556467	PRDX1	2
0.577092	0.04799	0.136986	0.714286	0.280469	0.018534	XDH	2
0.595689	0.0330234	0.240757	0.714286	0.474439	0.0586975	LDHA	2
0.619738	0.0330234	0.198733	0.714286	0.34934	0.127566	GOT2	2
0.550433	0.0702091	0.136986	0.714286	0.368457	0.138725	LUM	2
0.531614	0.0378289	0.231137	0.714286	0.286071	0.0961814	GHITM	2
0.545953	0.0466289	0.1875	0.714286	0.313131	0.10596	ATP2C1	2
0.572776	0.0160341	0.131274	0.714286	0.177003	0.0186902	CLU	2
0.577342	0	0.244367	0.714286	0.144265	0	ALAS2	2
0.516808	0.0510508	0.169207	0.714286	0.243596	0.0520906	GNB2L1	2
0.540635	0.0343112	0.176636	0.714286	0.211643	0.0446977	RPL10	2
0.642254	0.0605125	0.264286	0.714286	0.289579	0.0946009	SCG5	2
0.620677	0.0661406	0.236969	0.714286	0.270899	0.0709998	PSMD6	2
0.608483	0	0.245454	0.714286	0.247804	0.0653196	CSNK1A1	2
0.417121	0.0833076	0.143183	0.714286	0.598783	0.0849717	RHOA	2
0.725364	0.105528	0.237288	0.714286	0.462252	0.173755	RNH1	2
0.603978	0.0463852	0.241932	0.714286	0.244087	0.0666348	CTSC	2
0.597106	0.0160341	0.242177	0.714286	0.175059	0.0128172	SLC39A7	2
0.641244	0.0403816	0.264858	0.714286	0.219743	0.0461538	ACAT2	2
0.669472	0.04799	0.266417	0.714286	0.288159	0.0401783	NUCB1	2
0.538673	0.0330234	0.212219	0.714286	0.208087	0.0262616	SNW1	2
0.535118	0.0403816	0.232844	0.714286	0.219743	0.0474235	OGN	2
0.584083	0	0.242549	0.714286	0.295963	0.0954914	CTNNB1	2
0.563754	0.00987272	0.234489	0.714286	0.168955	0.00141307	NFKBIA	2
0.554897	0	0.235096	0.714286	0.474439	0	C1QB	2
0.497291	0.0160341	0.193186	0.714286	0.694636	0.0368342	ZFP36	2
0.651104	0.0510508	0.252036	0.714286	0.295963	0.0954914	EIF4A1	2
0.611895	0.0242007	0.253551	0.714286	0.189124	0.0270691	LMNA	2
0.598851	0.0661406	0.243028	0.714286	0.270899	0.0709998	SMARCB1	2
0.583263	0	0.245148	0.714286	0.144265	0	PNPLA6	2
0.571345	0.0510508	0.201628	0.714286	0.288159	0.0653196	RPL3	2
0.612253	0.0510508	0.224624	0.714286	0.330911	0.116648	CTSH	2
0.517693	0.0160341	0.223534	0.714286	0.175059	0.0128172	NR4A1	2
0.539497	0.00436684	0.230527	0.714286	0.182736	0	TEX261	2
0.525485	0.0510508	0.231641	0.714286	0.243596	0.040386	EIF5A	2
0.530326	0.0242007	0.239775	0.714286	0.189124	0.0270691	NPC2	2
0.470759	0.0160341	0.219183	0.714286	0.694636	0.0128172	MOGAT1	2
0.520586	0.0330234	0.226144	0.714286	0.208087	0.0262616	ABHD10	2
0.745326	0.0909021	0.228571	0.714286	0.380463	0.145164	PPP2CA	2
0.68738	0.0510508	0.2499	0.714286	0.247804	0.0653196	UHRF1	2
0.576087	0.0403816	0.236969	0.714286	0.263331	0.0751796	UQCRC1	2
0.597282	0.00987272	0.240174	0.714286	0.474439	0.00141307	SLC25A11	2
0.569288	0.0510508	0.230592	0.714286	0.243596	0.040386	IFRD2	2
0.619718	0	0.245623	0.714286	0.144265	0	NDUFV3	2
0.610195	0.0510508	0.242021	0.714286	0.247804	0.0653196	LEO1	2
0.628384	0.120765	0.257713	0.714286	0.434356	0.171829	MRM1	2
0.559606	0.00530984	0.23299	0.714286	0.279374	0.0852342	GLTSCR2	2
0.561416	0.0510508	0.2278	0.714286	0.243596	0.040386	C1QBP	2
0.522177	0.0112501	0.225467	0.714286	0.246374	0	PDLIM7	2
0.539462	0	0.240952	0.714286	0.144265	0	NAGK	2
0.651077	0.0330234	0.254826	0.714286	0.279374	0.0852342	METAP2	2
0.555715	0.0242007	0.196716	0.714286	0.279374	0.0852342	SCARB1	2
0.585861	0.0498286	0.236969	0.714286	0.240399	0.0575877	CTSD	2
0.573934	0.0160341	0.245393	0.714286	0.175059	0.0128172	HSPB1	2
0.581022	0.0242007	0.209745	0.714286	0.279374	0.0852342	NFIA	2
0.721746	0.0909021	0.262092	0.714286	0.380463	0.145164	FLNA	2
0.553453	0.0330234	0.235559	0.714286	0.232766	0.0556467	CNOT7	2
0.585311	0.0613455	0.250865	0.714286	0.271381	0.0794016	LGTN	2
0.615196	0.0510508	0.243666	0.714286	0.243596	0.040386	CCT4	2
0.586809	0.0330234	0.239779	0.714286	0.232766	0.0556467	OAT	2
0.612415	0.0666356	0.250521	0.714286	0.39173	0.0822677	ATP5G1	2
0.52018	0.0232814	0.17527	0.714286	0.34934	0.127566	FOLR2	2
0.617063	0.0160341	0.168067	0.714286	0.378184	0.0461538	RPL24	2
0.610851	0.0510508	0.257161	0.714286	0.243596	0.040386	SREBF1	2
0.569619	0	0.238308	0.714286	0.144265	0	PRDX2	2
0.616061	0.0403816	0.251339	0.714286	0.224777	0.0627039	DDX5	2
0.694166	0.0510508	0.284383	0.714286	0.243596	0.040386	SPRY1	2
0.536571	0.0330234	0.147974	0.714286	0.208087	0.0520906	IGFBP2	2
0.544133	0.0510508	0.205521	0.714286	0.474439	0.0575877	SFMBT1	2
0.529258	0.0160341	0.224979	0.714286	0.474439	0.0128172	CORO1B	2
0.545284	0.0330234	0.235781	0.714286	0.208087	0.0262616	DRG1	2
0.608076	0.0330234	0.243445	0.714286	0.295963	0.0954914	GSTP1	2
0.56608	0.0184073	0.240415	0.714286	0.474439	0.0423868	ANXA11	2
0.71765	0.0510508	0.27106	0.714286	0.243596	0.040386	CCT5	2
0.508744	0	0.230722	0.714286	0.144265	0	HES5	2
0.596457	0	0.240317	0.714286	0.474439	0.0316134	CXCR4	2
0.624621	0.0466289	0.254826	0.714286	0.368457	0.138725	CTSZ	2
0.600038	0.077013	0.207748	0.714286	0.474439	0.0926331	ATP5G3	2
0.601779	0.0697918	0.225843	0.714286	0.430384	0.173755	RHEB	2
0.592779	0.0160341	0.248395	0.714286	0.237042	0.0276817	RBM9	2
0.602134	0.0510508	0.207837	0.714286	0.264835	0.0847366	RPS3	2
0.568897	0.0412245	0.234058	0.714286	0.474439	0.0262616	CCT6A	2
0.612392	0.0605125	0.245748	0.714286	0.474439	0.0946009	DNPEP	2
0.593822	0.0510508	0.247846	0.714286	0.243596	0.040386	IMMT	2
0.573015	0.00292851	0.235014	0.714286	0.224777	0.0627039	SLC35C2	2
0.604137	0.0498286	0.243622	0.714286	0.247804	0.0653196	C1D	2
0.651178	0	0.266731	0.714286	0.204054	0.0368342	PDE6D	2
0.642597	0.0510508	0.268463	0.714286	0.243596	0.040386	SPAG7	2
0.74209	0.0824765	0.284901	0.714286	0.452717	0.185993	DPP3	2
0.616003	0.0510508	0.246323	0.714286	0.243596	0.040386	CCDC22	2
0.583392	0.0613455	0.238592	0.714286	0.271381	0.0822677	B4GALT2	2
0.595571	0.0330234	0.239697	0.714286	0.208087	0.0276817	DDX50	2
0.569737	0	0.238953	0.714286	0.144265	0.00246504	POMT1	2
0.57398	0.0195339	0.24012	0.714286	0.247804	0.0653196	FIS1	2
0.595791	0.0160341	0.238465	0.714286	0.182736	0.030858	PLP2	2
0.654329	0.0320864	0.261076	0.714286	0.224777	0.0627039	NR2F1	2
0.655538	0.0498286	0.257457	0.714286	0.368457	0.138725	CLIC1	2
0.60059	0	0.241605	0.714286	0.144265	0.00262474	CTSA	2
0.581449	0.0510508	0.23953	0.714286	0.378184	0.040386	FKBP4	2
0.559412	0.0160341	0.232447	0.714286	0.20628	0.0128172	FUS	2
0.760572	8.87023e-05	0.210253	0	0.0522004	5.65338e-05	Organism	1
0	0	0	0.714286	0.144265	0	C1S	1
0	0.0909021	0	0.714286	0.380463	0.145164	ACTR1A	1
0.499032	0.0510508	0.0773109	0.714286	0.243596	0.040386	EEF1B2	1
0.387524	0.0330234	0.12157	0.714286	0.208087	0.0262616	NUBP2	1
0.354309	0.0510508	0.116267	0.714286	0.243596	0.040386	SF1	1
0.415968	0	0.170838	0.714286	0.144265	0	EHF	1
0.380867	0.0330234	0.117964	0.714286	0.474439	0.0262616	NUDCD2	1
0.49816	0.0330234	0.187161	0.714286	0.218148	0.0586975	GAK	1
0.265765	0.0242007	0.0390977	0.714286	0.204054	0.0368342	YY1	1
0.487779	0.0160341	0.1	0.714286	0.232766	0.0556467	SPNS1	1
0.368267	0.0466289	0.0649351	0.714286	0.264835	0.0847366	TNNC1	1
0.270125	0.0403816	0.0543855	0.714286	0.219743	0.0401783	MYL2	1
0.433937	0.0242007	0.117895	0.714286	0.189124	0.0270691	DERL1	1
0.422494	0.0510508	0.110089	0.714286	0.243596	0.040386	GPI	1
0.473908	0.0661406	0.144558	0.714286	0.288159	0.0709998	TKT	1
0.470328	0.0330234	0.151515	0.714286	0.444858	0.0461538	RPL7A	1
0.472622	0.0160341	0.131696	0.714286	0.474439	0.0316134	RPL4	1
0.483963	0.0195339	0.209117	0.714286	0.184483	0.032296	PPIB	1
0.482514	0.0330234	0.162536	0.714286	0.208087	0.0368342	NUDT2	1
0.496704	0.0510508	0.166502	0.714286	0.243596	0.040386	RWDD1	1
0.447121	0.0160341	0.125842	0.714286	0.474439	0.0128172	G6PD	1
